# Supplementary material
Source: HighWire-hosted journal article supplement (https://erj.ersjournals.com/content/59/6/2103051)
Supplement: inline-supplementary-material-1 [file inline-supplementary-material-1.pdf]

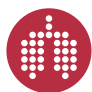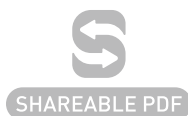

## Reply: The effectiveness of singing *versus* exercise training

Anders Løkke <sup>ID</sup><sup>1,2</sup>, Mette Kaasgaard <sup>ID</sup><sup>3,4</sup>, Karen Hjerrild Andreasson <sup>ID</sup><sup>2,3,5</sup>, Daniel Bech Rasmussen <sup>ID</sup><sup>2,3</sup>, Ole Hilberg <sup>ID</sup><sup>1,2</sup>, Peter Vuust <sup>ID</sup><sup>4</sup> and Uffe Bodtger <sup>ID</sup><sup>2,3,6</sup>

<sup>1</sup>Dept of Respiratory Medicine, Lillebaelt Hospital, Vejle, Denmark. <sup>2</sup>Dept of Regional Health Research, University of Southern Denmark, Odense, Denmark. <sup>3</sup>Pulmonary Research Unit Region Zealand (PLUZ), Dept of Respiratory Medicine, Zealand University Hospital, Naestved, Denmark. <sup>4</sup>Center for Music in the Brain, Dept of Clinical Medicine, Aarhus University, Denmark and the Royal Academy of Music, Aarhus/Aalborg, Denmark. <sup>5</sup>Dept of Physiotherapy and Occupational Therapy, Naestved-Slagelse-Ringsted Hospitals, Naestved, Denmark. <sup>6</sup>Dept of Internal Medicine, Zealand University Hospital Roskilde, Roskilde, Denmark.

Corresponding author: Mette Kaasgaard ([mk@clin.au.dk](mailto:mk@clin.au.dk))

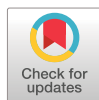

Shareable abstract (@ERSpublications)

**This paper reports a proof-of-concept study, clarifying that singing actually affects 6MWD, and this finding is promising when offering PR to patients who for some reason cannot or will not participate in conventional exercise training** <https://bit.ly/3276d7b>

**Cite this article as:** Løkke A, Kaasgaard M, Andreasson KH, *et al.* Reply: The effectiveness of singing *versus* exercise training. *Eur Respir J* 2022; 59: 2103051 [DOI: 10.1183/13993003.03051-2021].

This single-page version can be shared freely online.

Copyright ©The authors 2022.  
For reproduction rights and  
permissions contact  
[permissions@ersnet.org](mailto:permissions@ersnet.org)

Received: 01 Dec 2021  
Accepted: 10 Dec 2021

*Reply to A.W. Vaes and co-workers:*

We are happy to learn that you have read our paper [1] with great interest.
